## RESEARCH ARTICLE

# A quantitative analysis of growth control in the *Drosophila* eye disc

Jannik Vollmer<sup>1,2</sup>, Patrick Fried<sup>1,2</sup>, Max Sánchez-Aragón<sup>3</sup>, Carla S. Lopes<sup>3,\*</sup>, Fernando Casares<sup>3,‡</sup> and Dagmar Iber<sup>1,2,‡</sup>

## ABSTRACT

The size and shape of organs is species specific, and even in species in which organ size is strongly influenced by environmental cues, such as nutrition or temperature, it follows defined rules. Therefore, mechanisms must exist to ensure a tight control of organ size within a given species, while being flexible enough to allow for the evolution of different organ sizes in different species. We combined computational modeling and quantitative measurements to analyze growth control in the *Drosophila* eye disc. We find that the area growth rate declines inversely proportional to the increasing total eye disc area. We identify two growth laws that are consistent with the growth data and that would explain the extraordinary robustness and evolutionary plasticity of the growth process and thus of the final adult eye size. These two growth laws correspond to very different control mechanisms and we discuss how each of these laws constrains the set of candidate biological mechanisms for growth control in the *Drosophila* eye disc.

**KEY WORDS:** Eye disc development, Growth dynamics, Robustness, Organ size

## INTRODUCTION

The size and shape of organs is species specific to an extent that they represent major taxonomical traits. Even in species where organ size is strongly influenced by environmental cues, such as nutrition or temperature, it follows defined rules, called reaction norms (Moczek et al., 2011). Therefore, mechanisms must exist to ensure a tight control of organ size within a given species, while at the same time they should be flexible enough to allow for the evolution of organs that are different sizes in different species. These mechanisms operate during the development of the organism, i.e. they are developmental mechanisms. Still, the nature of these mechanisms is far from understood.

Much of what is currently known about how final organ size is controlled has been learnt from insects and particularly from studies in *Drosophila* (Shingleton, 2010). The external organs of the *Drosophila* adult (or imago) develop from larval primordia formed by epithelial sacs, called imaginal discs (Cohen, 1993). Imaginal discs have an interesting property: they stop growth when their normal size has been attained even if given extra developmental time (Bryant and Levinson, 1985; Bryant and Simpson, 1984; Garcia-Bellido, 1965; Martín and Morata, 2006). Therefore, imaginal discs have an autonomous mechanism that surveys

organ size and terminates growth once a target size has been reached. Further evidence suggests that intrinsic mechanisms of growth termination also exist in vertebrates (Dittmer et al., 1974; Metcalf, 1964; Twitty and Schwind, 1931). A number of experiments rule out a simple cell-counting mechanism, by which cell proliferation would stop after a prefixed number of cell divisions. Thus, increasing or decreasing cell proliferation by modifying cyclin/cyclin-dependent kinase activity results in smaller or larger cells, respectively, but normal-sized discs (Neufeld et al., 1998; Weigmann et al., 1997).

In imaginal discs, growth rates are controlled by patterning signals (Shingleton, 2010). In the wing disc – where most studies have been carried out – the pace of growth is modulated by the combined action of at least two signaling pathways: that of the BMP2-like morphogen Decapentaplegic (Dpp), which is secreted from a stripe in the middle of the disc, and signaling of the protocadherin Fat, so that, together, uniform growth rates are attained throughout the disc (Schwank et al., 2012). Two sets of models have been proposed to explain how organ growth terminates. One of them posits that the dynamics of Dpp signaling itself is responsible for growth termination (Wartlick et al., 2011). In this model, cells measure the relative increase in the Dpp signal during development. Cell division is triggered every time a fixed relative change in the local Dpp concentration has been reached and uniform tissue growth is achieved despite localized Dpp production and the resulting Dpp gradient, because the Dpp gradient scales with organ growth. According to this model, the observed decline in the cell division rate with time is explained by the almost linear increase in the Dpp concentration with time, such that it takes progressively longer to reach that fixed relative concentration increase. Wing disc growth has, however, been reported to be normal in clones that lack the only Dpp transducer Mad and its downstream target Brk (Schwank et al., 2012), and recent studies show that growth depends on Dpp only during the first half of larval development (Akiyama and Gibson, 2015) and that lateral cells divide at normal speed if the Dpp gradient is abolished (Harmansa et al., 2015).

Another set of models includes the potential role of mechanical feedback during growth. According to these models, growth is limited by the mounting pressure in the center of the growing disc domain and stimulated by the increasing strain in the outer parts of the domain, thus enabling uniform growth and growth termination (Aegerter-Wilmsen et al., 2007, 2012; Hufnagel et al., 2007; Shraiman, 2005). When linked with a signaling model for the disc's key patterning signaling system [Dpp, Wingless (Wg), Notch] as well as for Vestigial, Four-jointed, Dachshous and components of the Hippo pathway, the mechanical feedback model can reproduce many additional experimental observations beyond uniform growth and growth termination, but still fails to yield the experimentally observed growth kinetics and final disc size (Aegerter-Wilmsen et al., 2012). Growth and tension anisotropies have been associated with the regulation of the direction of cell division, thus linking

<sup>1</sup>Department of Biosystems, Science and Engineering (D-BSSE), ETH Zurich, Mattenstrasse 26, Basel 4058, Switzerland. <sup>2</sup>Swiss Institute of Bioinformatics (SIB), Mattenstrasse 26, Basel 4058, Switzerland. <sup>3</sup>Department of Gene Regulation and Morphogenesis, CABD, CSIC and Universidad Pablo de Olavide, Campus UPO, Seville 41013, Spain.

\*Present address: IBMC/13S, Universidade do Porto, Oporto, Portugal.

‡Authors for correspondence (fcasfer@upo.es; dagmar.iber@bsse.ethz.ch)

Received 12 August 2015; Accepted 29 February 2016

growth to organ shape (Aegerter-Wilmsen et al., 2012; Baena-López et al., 2005; Benham-Pyle et al., 2015; González-Gaitán et al., 1994).

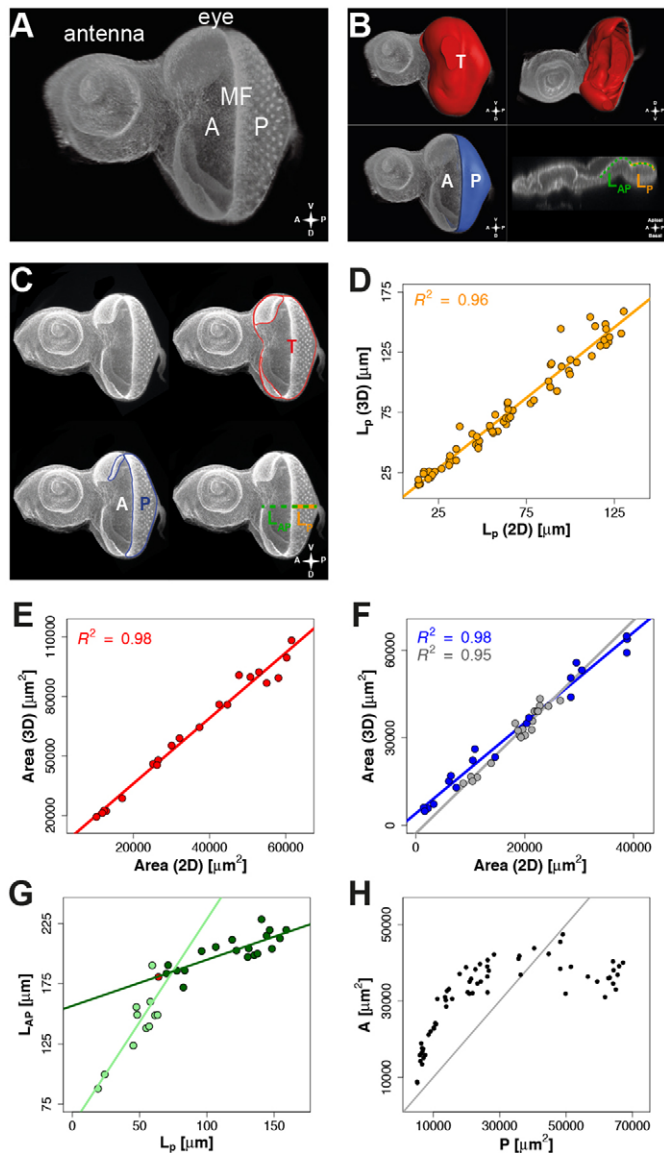

**Fig. 1. Quantitative measurements of the *Drosophila* eye imaginal disc.** (A) 3D reconstruction of the eye-antenna imaginal disc. The prospective antenna and eye are labeled. MF, morphogenetic furrow; A, anterior area; P, posterior area. Axes are marked as V (ventral), D (dorsal), A (anterior) and P (posterior). Tissues of a neighboring eye disc present in the original image were removed to enhance the clarity of the illustration. (B) The surface of the eye primordium reconstructed in 3D (for details, see Materials and Methods). The total eye primordium area (T, red, shown from dorsal and ventral side) can be divided into its posterior (P, blue) and anterior (A, gray) parts. The posterior ( $L_P$ , yellow) and total length ( $L_{AP}$ , dashed green) were measured along the anterior-posterior axis. (C) 2D measurements of areas and lengths on maximum intensity projection of the discs. Color code as in B. (D-F) 3D and 2D measurements of (D) the posterior length  $L_P$ ; (E) the total area  $T$ ; (F) the posterior area  $P$  (blue); and the anterior area  $A$  (gray), are linearly correlated. (G) The total length ( $L_{AP}$ ) shows a biphasic profile with a fast initial expansion (light green) and a slower second phase (dark green). The 'switch point' (red) of the phases was set such that the deviation between data and linear models was minimal (Fig. S1). (H) Distribution of anterior and posterior areas over developmental time. The gray line indicates the identity line for illustration purposes.

Complementary to the wing imaginal disc, the eye imaginal disc offers an attractive system to study growth control (Fig. 1A). In the eye disc, *dpp* is also expressed in a stripe and plays an important role in eye patterning (Chanut and Heberlein, 1997; Pignoni and Zipursky, 1997). However, the relative position of the Dpp-producing stripe is not stationary as in the wing disc. Instead, the Dpp stripe is initiated at the posterior pole, and then sweeps across the disc like a wave towards its anterior pole (Heberlein et al., 1993). Moreover, proliferation in the eye disc is not uniform: the Dpp stripe coincides with an indentation of the epithelium called the morphogenetic furrow (MF). Anterior to the MF, progenitor cells proliferate, with a peak in the first mitotic wave, followed by a synchronous entry in the G1 phase of the cell cycle at the MF. Posterior to the MF, cells differentiate, either directly or after a terminal mitotic round (Wolff and Ready, 1993). Therefore, most proliferation occurs anterior to the MF. Quantitative studies of eye disc growth revealed a correlation between cell proliferation rates and the relative change in Dpp signaling, similar to the previously reported correlation for the wing disc (Wartlick et al., 2014). In the eye disc, a local increase in Dpp concentration is the result of movement of the Dpp gradient as the MF progresses. However, much as in the wing disc (Schwank et al., 2012), clones that lack both the Dpp signal transducer Mad and its downstream target and pathway repressor Brk grow at the same rate as wild-type cells (Wartlick et al., 2014). Therefore, the mechanism that controls growth termination still remains elusive.

To define alternative candidate mechanisms for growth control we studied the eye disc growth process quantitatively. To this end, we measured the anterior and posterior areas and lengths at different developmental stages. We then analyzed the growth process computationally. We show that two distinct growth laws are consistent with the growth data, and discuss how these growth laws constrain the possible biological mechanism underlying the remarkable robustness of the final adult eye size in *Drosophila*.

## RESULTS

### A quantitative analysis of eye disc growth

To characterize the eye disc growth process, we collected eye discs at different stages of development from early to late third instar (~76-130 h after egg deposition), stained the apical surface using an antibody against the apical marker atypical Protein kinase C (aPKC) (Suzuki et al., 2001; Wodarz et al., 2000) and measured the anterior (A) and posterior (P) areas, which are separated by the MF, where Dpp is produced (Fig. 1A). Measurements were made both in 3D (Fig. 1B) and on 2D projections (Fig. 1C) generated from confocal z-stacks (for details, see Materials and Methods). We noted that 2D and 3D values were perfectly correlated for all considered measures, i.e. for the posterior length,  $L_P$  (Fig. 1D) as well as for the total area  $T$  (Fig. 1E), the posterior area  $P$  (Fig. 1F, blue) and the anterior area  $A$  (Fig. 1F, gray). We could therefore use this correlation to extrapolate our larger 2D datasets to 3D.

During eye disc development, growth is terminated when the MF reaches the anterior side by exhausting the pool of progenitor cells. Whereas the speed of the MF is constant (after an initial lag phase; Wartlick et al., 2014), the anterior-posterior (AP) axis of the eye disc initially expands rapidly, but subsequently the expansion speed declines (Fig. 1G, Fig. S1) and the MF can reach the anterior pole and terminate growth. This is also reflected in the relative sizes of the anterior and posterior sides: initially the anterior area grows faster than the posterior area, but as the expansion of the AP axis slows down, the anterior area shrinks as the posterior area further expands (Fig. 1H). In principle, the slowdown in eye disc growth

could result from a shrinkage of the proliferating anterior area due to the progression of the MF or from a decline in the area growth rate. We therefore sought to determine the area growth rate from our dataset.

### The growth rate declines over developmental time

The change of the total area is dependent on the proliferative expansion of the anterior area at some rate  $k(L_P) \cdot A$ , and the simultaneous conversion of anterior area into posterior area through the movement of the MF. The posterior length  $L_P$  can be used as a measure of developmental time because the speed of the MF is constant after an initial lag phase (Wartlick et al., 2014). The rate of eye disc growth can thus be measured as the rate of total eye disc growth per micrometer advancement of the MF,  $\frac{dT}{dL_P}$ , and is given as the sum of the change in the anterior area  $\frac{dA}{dL_P}$  and the posterior area  $\frac{dP}{dL_P}$ :

$$\frac{dT}{dL_P} = \frac{dA}{dL_P} + \frac{dP}{dL_P} = k(L_P) \cdot A + L_{MF}(L_P) \cdot (\Phi - 1). \quad (1)$$

The second term describes the anterior-to-posterior conversion, with  $L_{MF}(L_P)$  being the length of the MF in the dorsal-ventral direction at a given  $L_P$ . If the conversion of anterior area into posterior area does not alter the total area, then  $\Phi=1$ . The change of the total area is then only dependent on the proliferative expansion  $k(L_P) \cdot A$ .

In a first step, we use  $\Phi=1$  and we then have for the area growth rate:

$$k(L_P) = \frac{dT}{dL_P}. \quad (2)$$

To determine the area growth rate  $k(L_P)$  from the data, we determined  $\frac{dT}{dL_P}$  and  $A(L_P)$  at different posterior lengths  $L_P$ .  $\frac{dT}{dL_P}$  was obtained by plotting the total area  $T$  versus  $L_P$  (Fig. 2A) and by subsequently determining the slope of the fit. The data points were not perfectly approximated by a linear fit (Fig. 2A, black line), and we therefore also considered three spline fits (Fig. 2A, gray lines). When we plotted the resulting  $k(L_P)$  versus  $L_P$ , we saw that the spline fits yielded slightly higher  $k(L_P)$  values at the beginning and slightly lower  $k(L_P)$  values at the end (Fig. 2B). The confidence in the estimated  $k(L_P)$  is thus lowest for large  $L_P$  values, for which we have the least data. In what follows, we will use the average of all the fits.

All fits yielded a similar overall decline of the growth rate (Fig. 2B), which rejects growth mechanisms with a constant growth rate:

$$k(L_P) = k_0. \quad (3)$$

We rather notice a linear relationship between  $\ln[k(L_P)]$  and  $\ln(L_P)$  (Fig. 2C), suggesting a power law relationship between the area growth rate and developmental time:

$$k(L_P) = k_0 \left( \frac{L_P(0)}{L_P} \right)^\delta. \quad (4)$$

Remarkably, a plot of  $\ln[k(L_P)]$  versus  $\ln(T)$  reveals a linear relationship with slope minus one (Fig. 2D), also supporting an area-dependent growth law of the form:

$$k(L_P) = k_0 \left( \frac{T(0)}{T(L_P)} \right). \quad (5)$$

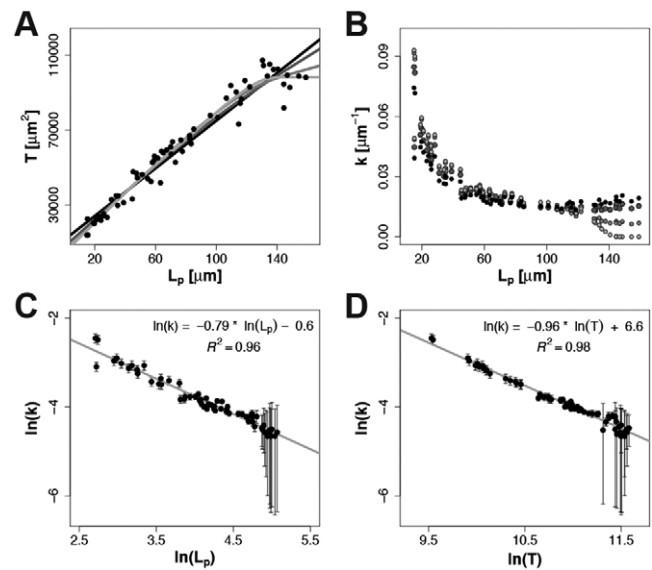

**Fig. 2. The growth rate declines over developmental time.** (A) The increase of the total area  $T$  with increasing posterior length  $L_P$  was fitted using a linear model (black), as well as spline fits with increasing degrees of freedom (dark to light gray). (B) The area growth rate  $k$  as determined from the slope of the fits in A; color code as in A. (C) In-In plot of the growth rate  $k$  versus posterior length  $L_P$ . (D) In-In plot of the growth rate  $k$  versus total area  $T$ . (C,D) Error bars indicate mean  $\pm$  s.d.

Although there is no simple mechanism that would result in a power-law growth law as given by Eqn 4, the area-dependent growth rate in Eqn 5 would imply that the growth rate declines proportional to an increase in the total area  $T$  as would be the case if an extracellular, diffusible growth factor was diluted by growth. Previously, exponentially declining growth rates, known as Gompertz law, which have been studied extensively in ecological models (Capocelli and Ricciardi, 1974; Gamito, 1998; Nobile et al., 1982), have been found appropriate to describe the growth kinetics of entire embryos (Ricklefs, 2010). We therefore also considered the possibility that the area growth rate may decline exponentially with developmental time:

$$k(L_P) = k_0 e^{-\delta(L_P - L_P(0))} + k_1 = k_0 \left( \frac{e^{L_P(0)}}{e^{L_P}} \right)^\delta + k_1. \quad (6)$$

Here, we considered one purely exponential model with  $k_1=0$  and one with the additional non-zero constant rate  $k_1$ . Such a growth law would correspond to the constant removal of a growth factor according to:

$$\frac{dk}{dL_P} = -\delta k \Leftrightarrow k(L_P) = k_0 e^{-\delta(L_P - L_P(0))} + k_1. \quad (7)$$

### The eye disc shape can be approximated by an ellipse

To test the suitability of the different growth laws, we sought to simulate the growth process using our dynamic model of the area increase  $\frac{dT}{dL_P} = k(L_P)A$  (Eqn 1) with the different models for  $k(L_P)$ , and compare the predicted growth kinetics to the measured data. To conduct the simulations, we needed to be able to calculate the anterior area  $A$  from  $T$  and  $L_P$ . We notice that the segment of an

ellipse can be calculated according to:

$$A = T \left[ 1 - \frac{1}{\pi} \left( \cos^{-1} \left( 1 - \frac{2L_P}{L_{AP}} \right) - 2 \left( 1 - \frac{2L_P}{L_{AP}} \right) \sqrt{\frac{L_P}{L_{AP}} \left( 1 - \frac{L_P}{L_{AP}} \right)} \right) \right], \quad (8)$$

$$P = T - A. \quad (9)$$

We confirmed the applicability of the ellipse description of the eye disc (Fig. 3A) by comparing the measured maximal AP length of the eye disc  $L_{AP}$  (Fig. 3B, green) with the one that we obtained from Eqn 8 (Fig. 3B, gray) with the measured  $L_P$  (Fig. 1D), the measured  $T$  (Fig. 1E) and the measured  $A$  (Fig. 1F). The minor axis of length  $a$  then follows as  $a = L_{AP}/2$ , and the major axis of length  $b$  as  $b = T/\pi a$  (Fig. 3C). Interestingly, the ratio of major to minor axis,  $\sigma = b/a$ , drops rapidly to about 2.3 (Fig. 3D), mainly because of an expansion of the minor axis  $a$  (Fig. 3C). After this initial phase, the eye disc grows isotropically and maintains an elliptic shape with a roughly constant ratio between the major and the minor axis (Fig. 3C,D).

### Quantitative data-based evaluation of the growth models

We used the ellipse description as given by Eqns 8 and 9 to test the different growth rate models with our area measurements. To this end, we solved the dynamic model of the area increase  $\frac{dT}{dt} = k(L_P)A$  (Eqn 1) with either a constant growth rate (CST)  $k(L_P) = k_0$  (Eqn 2), with a growth rate that decays according to a power law (POW)  $k(L_P) = k_0 \left( \frac{L_P}{L_P(0)} \right)^{-\delta}$  (Eqn 3), with a growth rate that declines with the increasing eye disc area (P\_A)  $k(L_P) = k_0 \frac{T(0)}{T(L_P)}$  (Eqn 4) or with a growth law that declines exponentially (EXP) for  $k_1=0$   $k(L_P) = k_0 \left( \frac{e^{L_P}}{e^{L_P(0)}} \right)^{-\delta}$  (Eqn 5) or with  $k_1>0$  (E+C)

$k(L_P) = k_0 e^{-\delta(L_P - L_P(0))} + k_1$  (Eqn 6). The anterior area  $A$  was determined from  $T$  and  $L_{AP}$  according to the equation for ellipse segments (Eqn 8).

We optimized the parameter values for each growth model such that the predicted total area (Eqn 1, Fig. 4A), posterior area (Eqn 9, Fig. 4B) and anterior area (Eqn 8, Fig. 4C) would best fit the measurements (Table 1, Fig. S2). We notice that for the best-fitting parameter sets, all models with a declining growth rate also fitted the measured growth rate  $k(L_P)$  (Fig. 4D, colored lines). A constant growth rate (Fig. 4, gray lines), however, fitted the data poorly and can therefore be ruled out and will not be further considered in what follows. Intriguingly, the models captured the experimentally observed decline in the ratio of major to minor axis,  $\sigma = b/a$  (Fig. 4E, colored lines), even though the parameter values were not optimized for these datasets.

An additional increase in the posterior area as a result of proliferation and cell differentiation, as can be incorporated by setting  $\phi > 1$  in Eqn 1, does not affect our overall conclusion (Fig. S3). Thus, all models with a declining growth rate still fit the measured data very well and capture the measured growth rate. The growth model with an area-dependent growth rate is particularly robust to such changes, while the other growth models yield a larger final eye disc area as  $\phi$  is increased (Fig. 4F). For all models, the match between measured and predicted ellipse shape  $\sigma = b/a$  worsens as  $\phi$  is increased (Fig. 4E inset; Fig. S3, last column).

In summary, based on the analysis of the growth rate kinetics, we can reject a constant growth rate. The other growth laws fit the data similarly well. We therefore sought additional datasets to evaluate the different candidate growth laws.

### Robustness of eye size

To evaluate the different growth laws, we next asked how each of the different growth laws would reproduce the naturally occurring size variations under the different conditions. Noise will introduce non-correlated changes into the parameter values, whereas changes in external conditions, e.g. temperature, can introduce correlated changes in the rate constants.

We first studied the impact of correlated changes in the kinetic parameter values on the final disc size and the time to termination. Environmental variations, e.g. temperature and nutrition, are well known to affect the final size of organs, but the impact is different in different organs. Thus, temperature changes affect the wing disc size substantially (3% per degree change), while eye disc size is considerably less affected (0.9% per degree change) (Azevedo et al., 2002). Interestingly, we found that for all growth laws, except for the power-law decay, the final disc size and the final anterior-posterior length (and thus the shape of the disc) did not change in response to parallel changes in the kinetic rate constants ( $v$ ,  $k_0$ ,  $\delta$ ) (Fig. 5A,B). In case of a power-law decay in the growth rate, such robustness is observed only as long as the exponent  $\delta$  (Eqn 4) is kept constant when the other parameters are changed (Fig. 5A,B, cyan symbols). Given the observed robustness of eye disc size to temperature changes, we can conclude that in case of a power-law growth law, the exponent  $\delta$  must not be affected by external processes. This independence of  $\delta$  would naturally be the case for the area-dependent growth rate, which is indeed robust to correlated changes (Fig. 5A,B, blue symbols).

Although the final area and AP length do not change in response to parallel changes in the parameter values (Fig. 5A,B), the time to termination changes in all cases, because a change in the MF speed,  $v$ , implies an opposite change in the time to termination ( $t_{\text{term}} \sim 1/v$ ). In *Drosophila*, the speed of growth processes can indeed differ strongly as a result of changes in external conditions, but the final

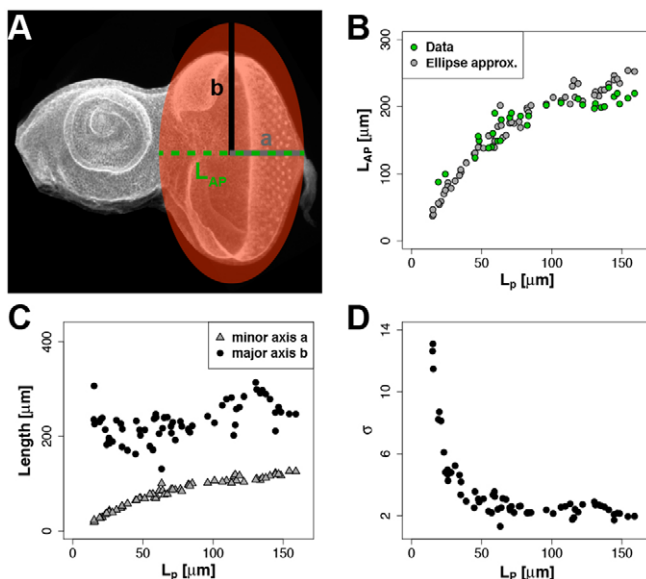

**Fig. 3. The shape of the *Drosophila* eye disc can be approximated by an ellipse.** (A) The shape of the eye disc can be approximated by an ellipse with minor axis  $a$  (gray) and major axis  $b$  (black). For illustration, the same disc was used as in Fig. 1A-C. (B) The measured (green) and inferred (Eqn 8, gray) length of the anterior-posterior axis  $L_{AP}$ . (C) Estimated minor  $a$  (gray) and major  $b$  (black) axes for an elliptic approximation of the eye imaginal discs. (D) The measurements are initially best fitted by a strongly elongated ellipse with a large ratio  $\sigma$  of major to minor axis. The ellipse subsequently expands largely isotropically with an approximately constant  $\sigma$  of about 2.3.

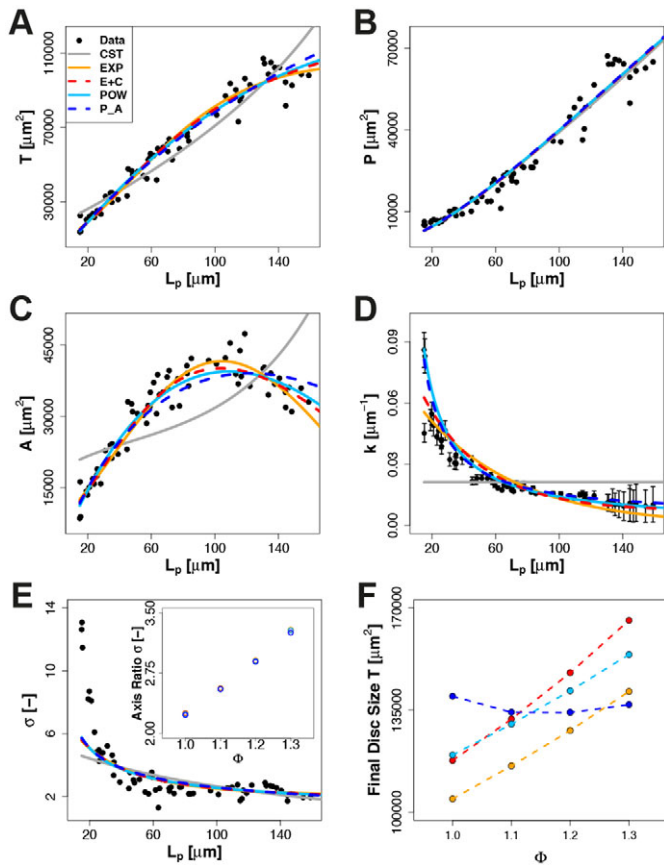

**Fig. 4. Model-based analysis of *Drosophila* eye disc growth.** (A-C) Fits of the different models to the measured total (A), posterior (B), and anterior (C) areas recapitulate the observed growth kinetics with the exception of the CST model (gray) (CST, constant, gray; EXP, exponential, orange; E+C, exponential+constant, red; POW, power-law, cyan; P\_A, area-dependent, blue). (D,E) The different fits also recapitulate the estimated decline in the area growth rate  $k$  (D) and the axis ratio  $\sigma$  (E). Inset shows axis ratio  $\sigma$  at 140  $\mu\text{m}$  for increasing  $\phi$  (Fig. S3). (F) The introduction of an additional increase in the posterior area while it is converted from anterior to posterior tissue  $\phi > 1$ , results in an increase of the final eye size for the EXP, E+C and POW models, whereas the final size remains approximately constant for the P\_A model (Fig. S3).

size of organs remains unaltered. Thus, when larvae develop at lower temperatures, eye discs attain about the same final size, whereas developmental time almost doubles (Azevedo et al., 2002).

To quantitatively compare the different growth models and to determine to what extent the decline in the growth rate would be adjusted when growth is slowed down, we used quantitative data for the growth process of grafted eye discs (Garcia-Bellido, 1965). Since no larval data were reported as a control in the grafting studies, we used our measurements of the eye discs as reference; we note that the final eye disc sizes were very similar for the larval (Fig. 5C,E)

and grafting data (Fig. 5D,F). To compare our kinetic measurements to the grafting experiments, we had to convert the posterior lengths in our measurements to developmental time by using the measured MF speed. The average posterior length has been reported to increase by 3.1  $\mu\text{m}/\text{h}$  (Wartlick et al., 2014). The average posterior length and the maximal posterior length  $L_P$  are linearly related in our measurements (Fig. S4) and accordingly, the measured MF speed can be expressed in terms of  $L_P$  as 3.4  $\mu\text{m}/\text{h}$ .

Strikingly, the models with the declining growth laws not only maintained the same final size at a lower growth rate, but also reproduced the growth kinetics of the grafted eye discs very well (Fig. 5D,F). As before, the exponent  $\delta$  had to be kept constant in the power-law growth law (Fig. 5F), and accordingly the area-dependent growth law fitted the grafting data very well (Fig. 5F, blue line).

Importantly, to achieve the slower, but size-preserving growth kinetics with the exponentially declining growth rate, the two rates,  $k_0$  and  $\delta$  (Eqn 6), had to be changed in parallel in the model (to 0.15-fold the standard value). A mechanism would thus have to be in place that changes the maximal growth rate  $k_0$  and the rate at which the growth rate declines ( $\delta$ ) in parallel. In case of the area-dependent growth rate the decline in the growth rate depended directly on the eye disc area and was therefore self-adjusting when  $k_0$  was reduced. We conclude that an area-dependent growth law offers the most parsimonious mechanism to achieve the size-preserving slower growth kinetics in the grafts.

**Variability of eye size between flies**

We next wondered how sensitive our models would be to uncorrelated changes in the parameter values, as may arise because of noise. To this end, we changed the parameter values,  $k_0$ ,  $\delta$ ,  $\sigma(0)$ ,  $v$  as well as the initial sizes  $T(0)$  and  $L_P(0)$  independently by 5% and recorded the impact on the final size  $T$  (Fig. 6A) and on the final length of the AP axis  $L_{AP}$  (Fig. 6B), which is linearly related to the time to termination  $t_{\text{term}}$ . We noticed that the greatest robustness to uncorrelated parameter changes is obtained with an exponentially decaying growth rate (Fig. 6A,B, orange symbols) and an area-dependent growth rate (Fig. 6A,B, blue symbols), whereas a power-law growth rate results in the greatest sensitivity (Fig. 6A,B, cyan symbols).

The variation between left and right adult eyes is much smaller than the variation between eyes of different flies (Fig. 6C). In particular, even though eye size differs substantially between females and males, the sizes of left and right eyes are strongly correlated ( $R^2=0.78$ ; Fig. 6C), while the correlation between head width and eye size is weak ( $R^2=0.29$ ; Fig. 6D). This shows that a mechanism is in place that permits flies to coordinate the growth of their left and right eye discs independently of the final eye size and of the overall growth of the body. The coordination between the size of the left and right wing has recently been shown to be achieved by a Dilp8-dependent developmental delay (Colombani et al., 2012;

**Table 1. Parameter values for all models with  $L_P(0)=15 \mu\text{m}$**

| Model | $k(L_P)$                                        | $T(0) (\mu\text{m}^2)$ | $k_0 (\mu\text{m}^{-1})$ | $\delta$                      | $k_1 (\mu\text{m}^{-1})$ | $\sigma(0)$ |
|-------|-------------------------------------------------|------------------------|--------------------------|-------------------------------|--------------------------|-------------|
| 1 CST | $k_0$                                           | 2.3911E+04             | 0.0213                   |                               |                          | 4.5870      |
| 2 EXP | $K_0 e^{-\delta(L_P - L_P(0))}$                 | 1.5595E+04             | 0.0555                   | 0.0169 ( $\mu\text{m}^{-1}$ ) |                          | 5.5309      |
| 3 E+C | $K_0 e^{-\delta(L_P - L_P(0))} + K_1$           | 1.5095E+04             | 0.0555                   | 0.0259 ( $\mu\text{m}^{-1}$ ) | 0.0071                   | 5.6146      |
| 4 POW | $k_0 \left(\frac{L_P}{L_P(0)}\right)^{-\delta}$ | 1.4237E+04             | 0.0864                   | 0.9555                        |                          | 5.7553      |
| 5 P_A | $k_0 \frac{T(0)}{T(L_P)}$                       | 1.4794E+04             | 0.0812                   |                               |                          | 5.7206      |

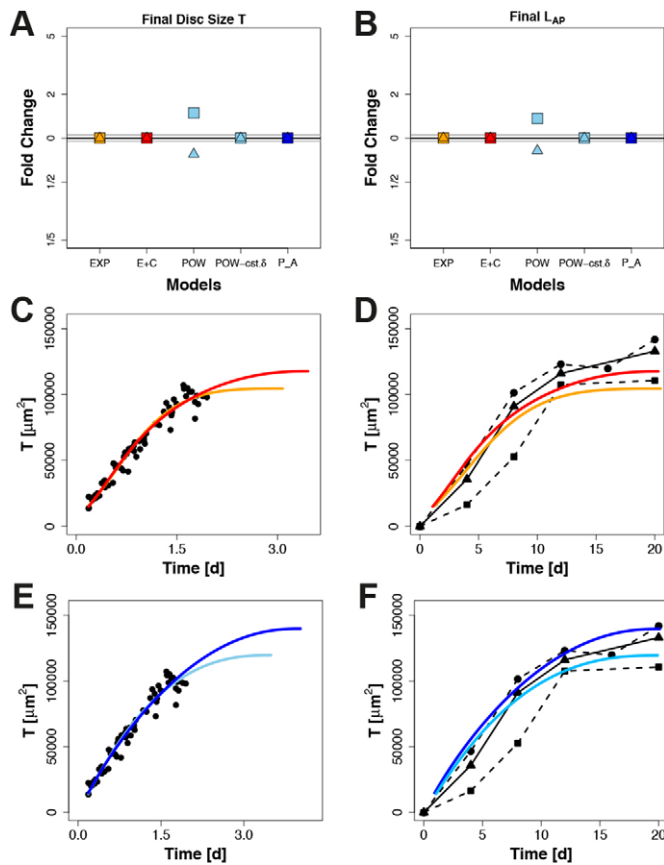

**Fig. 5. Robustness to parallel changes in kinetic parameter values.** (A,B) If all kinetic parameters ( $v$ ,  $k_0$ ,  $\delta$ ) are changed in parallel, final disc size (A) and final anterior-posterior length (B) are conserved for EXP, E+C and P\_A. In the case of the POW model, conservation is only observed if the parameter  $\delta$  is kept constant (POW-cst.  $\delta$ ). All parameters were either increased (triangles) or decreased (squares) by 5%. (C-F) Simulations of normal eye disc development (C,E) and of growth kinetics of discs grafted to the female adult abdomen (D,F) for the different models (EXP, orange; E+C, red; POW, cyan; P\_A, blue). In the transplant experiments (Garcia-Bellido, 1965), disc size was reported after transplantation (without brain) to fertilized (filled circles and dashed line) or virgin (filled squares and dashed line) host flies or with brain to fertilized host flies (filled triangles and solid line). The slower growth kinetics can be reproduced by all four growth laws if the kinetic parameters are lowered in parallel (D,F). In the case of the POW model, the exponent  $\delta$  has to be kept constant (F, cyan).

Garelli et al., 2012). However, it has remained unclear how the discs know their final target size. Much as in case of the grafting experiments (Fig. 5), an area-dependent mechanism would naturally achieve this as long as the MF progression is delayed when the growth process becomes delayed, and the starting size and growth rate are similar for the two sibling eye discs.

### Growth kinetics in differently sized eye discs

On the basis of the analysis of the growth processes in *Drosophila* eye discs, we found that the area-dependent growth rate and the exponentially declining growth rate are both valid candidate growth laws. We reasoned that the two growth laws could be best distinguished by comparing strains with different eye sizes because only for the area-dependent growth law does the decline of the growth rate depend on the area. With an exponential growth rate, the decline depends only on the developmental time passed.

We noticed that the eyes of the wild-type strain Oregon-R were significantly smaller than those of the *GMR-GAL4* strain that we had

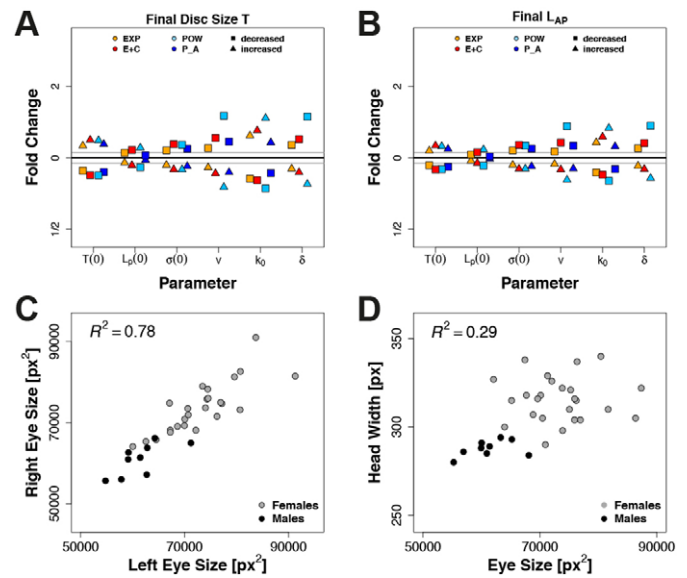

**Fig. 6. Variability of eye size.** (A,B) Impact of a 5% increase or decrease in all model parameters on the final size (A) and the final anterior-posterior length (B) for the different models. The gray lines mark the relative changes of the model parameters. Points that lie between the black and the gray lines indicate model parameters that lead to a change in outcome smaller than the parameter change. (C,D) A strong correlation between the left and right eye sizes of the same flies were observed (C), whereas no correlation for head width and mean eye size could be detected (D).

used so far (Fig. 7A). We therefore also determined the growth kinetics for the eye discs of Oregon-R female larvae (Fig. 7B-D, red). As expected, the total area  $T$  of the Oregon-R eye discs increased more slowly than in the *GMR-GAL4* strain (Fig. 7B), with smaller anterior areas at all times (Fig. 7C), whereas the eye disc shape was very similar at the same posterior length  $L_P$  (Fig. 7D).

Given the differences in the growth rates and eye disc sizes, we could use the data to evaluate the plausibility of the two candidate growth rates. To this end, we determined the slopes in the diagnostic  $\ln(k)$  versus  $L_P$  plot (Fig. 7E) and in the  $\ln(k)$  versus  $\ln(T)$  plot (Fig. 7F) for the two strains. To support either growth law, the plots should be fitted well by straight lines. In case of the area-dependent growth rate, the slope of the straight line in the  $\ln(k)$  versus  $\ln(T)$  plot needs to be minus one, as is indeed the case, both for the *GMR-GAL4* strain (black) and for the Oregon-R strain (red), even though the two strains both differed in total size over developmental time (Fig. 7B). The decline of the growth rate  $k(L_P)$  is nonetheless in both cases inversely proportional to the total eye disc area  $T$ . This strongly supports an area-dependent growth rate. However, we note that the data in the diagnostic  $\ln(k)$  versus  $L_P$  plot (Fig. 7E) is also fitted rather well by a line. The available data thus remain insufficient to discriminate between the two growth laws.

### DISCUSSION

We used *Drosophila* eye development as a model to study the mechanism of growth and organ size control. By combining quantitative measurements with a mathematical analysis, we found that the area growth rate declines with developmental progress in a way such that the area growth rate is inversely proportional to the total eye disc area, which was also true in a strain with smaller, more slowly growing eye discs (Figs 2 and 7). Strikingly, we found that two fundamentally different growth laws – an area-dependent growth law and an exponentially decaying growth rate – fit the eye disc growth data well.

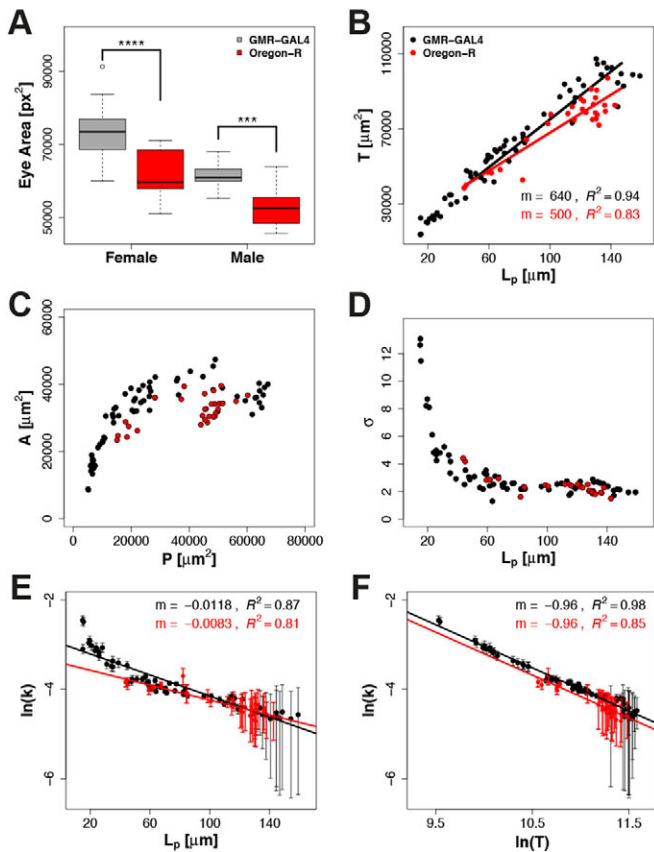

**Fig. 7. Growth rate analysis in two strains with different eye sizes.** (A) Eye sizes in adult *GMR-GAL4* (black) and *Oregon-R* (red) flies differ significantly. Significance was tested using an unpaired *t*-test, \*\*\*\* $P < 0.0001$  and \*\*\*\* $P < 0.001$ . Sample sizes: Or-R female and male,  $n = 17$  and  $n = 18$ , respectively; *GMR-GAL4* female and male,  $n = 25$  and  $n = 9$ , respectively. (B,C) The growth kinetics differ for the two genotypes with total area increasing more slowly in the *Oregon-R* strain (B) and *Oregon-R* having smaller anterior areas at all times (C). (D) The shape of the elliptical eye disc, as judged by the axis ratio  $\sigma = b/a$ , is similar for the two strains. (E,F) The estimated decline in the area growth rate cannot be used to distinguish between an exponentially declining (E) or area-dependent (F) growth rate model. (E) In-linear plot of the growth rate  $k$  versus posterior length  $L_p$ . (F) In-In plot of the growth rate  $k$  versus total area  $T$ . Error bars indicate mean  $\pm$  s.d. of the estimated growth rate.

However, the molecular mechanisms that would either lead to an area-dependent growth rate or an exponentially declining growth rate are very different. An exponentially declining growth rate could arise if a growth factor declined at a constant rate,  $\delta$ , over time (Eqn 6). Such a factor could be intracellular and non-diffusive. Importantly, in the more slowly growing grafted eye discs, the  $\delta$  of such a factor would have to scale directly with the slower developmental rate, potentially by being linked to the position of the MF,  $L_p$ , rather than to absolute developmental time. In the case of an area-dependent growth rate, the grafting results can be explained without any such additional scaling condition. An inverse relationship between the growth rate and the total area could arise if a long-lived, diffusible, extracellular growth factor was diluted as the organ grows. The factor would need to be extracellular and diffusible because the growth rate declines uniformly, whereas cell division patterns are non-uniform in the eye disc (Wolff and Ready, 1991). Moreover, the cellular response to such a factor would need to be linear over the diluted concentration range ( $\sim 5$ -fold), and the dispersal of the factor would need to be limited to an area close to the apical cell membrane such that its dilution was relative to the

area. Finally, the factor would need to be sufficiently long-lived to be diluted rather than degraded. This is a strong constraint, in particular in case of the grafting experiments where the eye disc grows over 2 weeks (Garcia-Bellido, 1965). However, we should note that in case of an exponentially declining growth factor the restriction would even be stronger in that the half-life of the candidate growth factor would not only have to be very long in grafted eye discs, but this half-life would have to be increased by the same factor by which development is delayed. Similarly, in case of a mechanical feedback model, it remains unclear whether the relaxation rate due to cell rearrangements (Shraiman, 2005) would be sufficiently slow to tolerate the hugely different developmental periods.

Declining growth rates are observed throughout development and aging, but, as a result of the moving MF, this would, in principle, not be necessary to terminate growth in the eye disc. However, in the eye disc, growth termination and the resulting eye size are much more robust with a declining growth rate than with a constant growth rate. In particular, an area-dependent growth rate maintains the final eye size also at vastly different developmental speeds, as has been observed previously at different culture temperatures and in grafting experiments. This independence on the developmental speed would also explain how a delay in metamorphosis, as mediated by the peptide *Dilp8* in the wing disc (Colombani et al., 2012; Garelli et al., 2012) can reduce, rather than enhance, the size difference between left and right sibling discs (Fig. 6D). The final eye size can nonetheless be altered either via changes in the starting size, in the shape of the eye disc or by altering the area growth rate relative to the speed of the MF (Fig. 7). These aspects must thus be controlled globally to ensure a low variability between sibling discs.

In summary, we conclude that the area growth rate in the eye disc declines inversely proportional to the total area increase. Our failure to discriminate between fundamentally different growth laws with the help of our quantitative growth data emphasizes that the reproduction of a measured growth kinetic alone is insufficient evidence for the biological relevance of a particular growth mechanism. Further work will be required to define a mechanistic link between the area increase and the decline in the growth rate in the eye disc.

## MATERIALS AND METHODS

### *Drosophila* strains

The *Drosophila* strain used throughout was *GMR-GAL4*, a strain that is frequently used to target gene function modifications in the developing eye (Freeman, 1996) and which exhibits normal eyes. *Oregon-R* is a wild-type strain. All flies were raised on standard medium at 25°C. For all analysis, only female larvae were used if not indicated otherwise.

### Antibody staining, fixation and imaging

Eye imaginal discs were dissected from larvae at different developmental points and fixed according to standard protocols (Casares and Mann, 2000). Rabbit anti-aPKC (Abcam, AB5813, 1:500) was used as primary antibody. Anti-rabbit Alexa Fluor 555 from Molecular Probes was used as fluorescently labeled secondary antibody (1:400). Stained discs were mounted in 80% glycerol in PBS, with DAPI (1:10,000) to counterstain nuclei, using three sticky tape layers as spacers between slide and the coverslip. Imaging of samples was carried out on a Leica TCS SPE microscope.

### Image analysis

To measure the eye discs in 3D, we first reconstructed the 3D apical surface of the developing eye disc. To this end, the apical membrane was segmented

using thresholding based on the aPKC antibody staining and subsequent manual corrections until a smooth and thin surface was achieved. Neighboring membranes (the opposing peripodial epithelium), as well as parts belonging to the antenna were removed manually. Surface reconstruction and measurements of 3D areas were done using Amira (FEI software). To measure the geometrical properties in 2D, maximum intensity projections were generated in ImageJ (Abràmoff et al., 2004) and the areas as well as the posterior length (Fig. 1B,C, yellow line) were also measured using ImageJ. The ventral eye disc folds onto itself forming a ventral ‘flap’, which can be visualized in 2D projections of the eye disc. We measured ventral flap areas separately and included these in the 2D measurements.

Eye sizes of adult flies were measured using ImageJ. The heads of adult flies were mounted in Hoyer’s: lactic acid (1:1) mounting medium and cleared by heating at 70°C overnight. Images were taken focusing on the front and back planes of the eye to account for all of the eye area. Front and back areas were summed up to give the total eye area.

### Computational analysis

All models were simulated as ordinary differential equations (ODEs) of the form:  $\frac{dT}{dL_p} = k(L_p)A + L_{MF}(L_p) \cdot (\Phi - 1)$ , with  $k(L_p)$  as summarized in Table 1, using a forward Euler scheme. In each step, the best-fitting ellipse shape  $\sigma$  was determined given total area  $T$ , posterior area  $P$ , and posterior length  $L_p$ . Parameters for the different growth laws were estimated by fitting the models to the measured total, anterior and posterior areas. Parameter estimation was done using a trust-region-reflective algorithm as implemented in the lsqnonlin function in MATLAB R2014b (Coleman and Li, 1996). All simulations were done using MATLAB R2014b or the free software environment R version 3.1.1 (R Development Core Team). All statistical analyses were done using R.

### Acknowledgements

We thank H. Sun (Academia Sinica, Taipei), E. Bach (Department of Biochemistry and Molecular Pharmacology, NYU, New York) and J. C. Hombria (CABD, Seville) for *Drosophila* stocks and the CABD Advanced Light Microscopy Facility and A. Iannini for technical support. We also thank Renato Paro and colleagues in our laboratories for discussions.

### Competing interests

The authors declare no competing or financial interests.

### Author contributions

D.I. and F.C. conceived the study. F.C., J.V., D.I., C.S.L. and M.S.A. designed experiments. F.C., J.V., C.S.L. and M.S.-A. performed experiments and acquired data. J.V. and P.F. analyzed data. J.V., P.F. and D.I. developed and analyzed the model. D.I., F.C. and J.V. wrote the manuscript.

### Funding

This work was supported by Ministerio de Economía y Competitividad [FU2012-34324 to F.C.]; and by a Swiss institute of Bioinformatics Fellowship to J.V.

### Supplementary information

Supplementary information available online at <http://dev.biologists.org/lookup/suppl/doi:10.1242/dev.129775/-/DC1>

### References

Abràmoff, M. D., Magalhães, P. J. and Ram, S. J. (2004). Image processing with ImageJ. *Biophotonics Int.* **11**, 36-42.

Aegerter-Wilmsen, T., Aegerter, C. M., Hafen, E. and Basler, K. (2007). Model for the regulation of size in the wing imaginal disc of *Drosophila*. *Mech. Dev.* **124**, 318-326.

Aegerter-Wilmsen, T., Heimlicher, M. B., Smith, A. C., de Reuille, P. B., Smith, R. S., Aegerter, C. M. and Basler, K. (2012). Integrating force-sensing and signaling pathways in a model for the regulation of wing imaginal disc size. *J. Cell Sci.* **125**, e1.

Akiyama, T. and Gibson, M. C. (2015). Decapentaplegic and growth control in the developing *Drosophila* wing. *Nature* **3**, 375-378.

Azevedo, R. B. R., French, V. and Partridge, L. (2002). Temperature modulates epidermal cell size in *Drosophila melanogaster*. *J. Insect Physiol.* **48**, 231-237.

Baena-López, L. A., Baonza, A. and García-Bellido, A. (2005). The orientation of cell divisions determines the shape of *Drosophila* organs. *Curr. Biol.* **15**, 1640-1644.

Benham-Pyle, B. W., Pruitt, B. L. and Nelson, W. J. (2015). Cell adhesion. Mechanical strain induces E-cadherin-dependent Yap1 and  $\beta$ -catenin activation to drive cell cycle entry. *Science* **348**, 1024-1027.

Bryant, P. J. and Levinson, P. (1985). Intrinsic growth control in the imaginal primordia of *Drosophila*, and the autonomous action of a lethal mutation causing overgrowth. *Dev. Biol.* **107**, 355-363.

Bryant, P. J. and Simpson, P. (1984). Intrinsic and extrinsic control of growth in developing organs. *Q. Rev. Biol.* **59**, 387-415.

Capocelli, R. M. and Ricciardi, L. M. (1974). Growth with regulation in random environment. *Kybernetik* **15**, 147-157.

Casares, F. and Mann, R. S. (2000). A dual role for homothorax in inhibiting wing blade development and specifying proximal wing identities in *Drosophila*. *Development* **127**, 1499-1508.

Chanut, F. and Heberlein, U. (1997). Role of decapentaplegic in initiation and progression of the morphogenetic furrow in the developing *Drosophila* retina. *Development* **124**, 559-567.

Cohen, S. M. (1993). Imaginal disc development. *Dev. Drosoph. melanogaster* **2**, 747-841.

Coleman, T. F. and Li, Y. (1996). An interior trust region approach for nonlinear minimization subject to bounds. *SIAM J. Optim.* **6**, 418-445.

Colombani, J., Andersen, D. S. and Léopold, P. (2012). Secreted peptide Dilp8 coordinates *Drosophila* tissue growth with developmental timing. *Science* **336**, 582-585.

Dittmer, J. E., Goss, R. J. and Dinsmore, C. E. (1974). The growth of infant hearts grafted to young and adult rats. *Am. J. Anat.* **141**, 155-160.

Freeman, M. (1996). Reiterative use of the EGF receptor triggers differentiation of all cell types in the *Drosophila* eye. *Cell* **87**, 651-660.

Gamito, S. (1998). Growth models and their use in ecological modelling: an application to a fish population. *Ecol. Model.* **113**, 83-94.

García-Bellido, A. (1965). Larvalentwicklung transplantiertes Organe von *Drosophila melanogaster* im Adultmilieu. *J. Insect Physiol.* **11**, 1071-1078.

Garelli, A., Gontijo, A. M., Miguela, V., Caparros, E. and Dominguez, M. (2012). Imaginal discs secrete insulin-like peptide 8 to mediate plasticity of growth and maturation. *Science* **336**, 579-582.

González-Gaitán, M., Capdevila, M. P. and García-Bellido, A. (1994). Cell proliferation patterns in the wing imaginal disc of *Drosophila*. *Mech. Dev.* **46**, 183-200.

Harmansa, S., Hamaratoglu, F., Affolter, M. and Caussinus, E. (2015). Dpp spreading is required for medial but not for lateral wing disc growth. *Nature* **527**, 317-322.

Heberlein, U., Wolff, T. and Rubin, G. M. (1993). The TGF beta homolog dpp and the segment polarity gene hedgehog are required for propagation of a morphogenetic wave in the *Drosophila* retina. *Cell* **75**, 913-926.

Hufnagel, L., Teleman, A. A., Rouault, H., Cohen, S. M., Shraiman, B. I., Hufnagel, L. and Teleman, A. A. (2007). On the mechanism of wing size determination in fly development. *Proc. Natl. Acad. Sci. USA* **104**, 3835-3840.

Martín, F. A. and Morata, G. (2006). Compartments and the control of growth in the *Drosophila* wing imaginal disc. *Development* **133**, 4421-4426.

Metcalf, D. (1964). Restricted growth capacity of multiple spleen grafts. *Transplantation* **2**, 387-392.

Moczek, A. P., Sultan, S., Foster, S., Ledón-Rettig, C., Dworkin, I., Nijhout, H. F., Abouheif, E. and Pfennig, D. W. (2011). The role of developmental plasticity in evolutionary innovation. *Proc. R. Soc. B Biol. Sci.* **278**, 2705-2713.

Neufeld, T. P., de la Cruz, A. F. A., Johnston, L. A. and Edgar, B. A. (1998). Coordination of growth and cell division in the *Drosophila* wing. *Cell* **93**, 1183-1193.

Nobile, A. G., Ricciardi, L. M. and Sacerdote, L. (1982). On Gompertz growth model and related difference equations. *Biol. Cybern.* **42**, 221-229.

Pignoni, F. and Zipursky, S. L. (1997). Induction of *Drosophila* eye development by decapentaplegic. *Development* **124**, 271-278.

Ricklefs, R. E. (2010). Embryo growth rates in birds and mammals. *Funct. Ecol.* **24**, 588-596.

Schwank, G., Yang, S.-F., Restrepo, S. and Basler, K. (2012). Comment on “Dynamics of Dpp Signaling and Proliferation Control”. *Science* **335**, 401.

Shingleton, A. W. (2010). The regulation of organ size in *Drosophila*: physiology, plasticity, patterning and physical force. *Organogenesis* **6**, 76-87.

Shraiman, B. I. (2005). Mechanical feedback as a possible regulator of tissue growth. *Proc. Natl. Acad. Sci. USA* **102**, 3318-3323.

Suzuki, A., Yamanaka, T., Hirose, T., Manabe, N., Mizuno, K., Shimizu, M., Akimoto, K., Izumi, Y., Ohnishi, T. and Ohno, S. (2001). Atypical protein kinase C is involved in the evolutionarily conserved PAR protein complex and plays a critical role in establishing epithelia-specific junctional structures. *J. Cell Biol.* **152**, 1183-1196.

Twitty, V. C. and Schwind, J. L. (1931). The growth of eyes and limbs transplanted heteroplastically between two species of *Amblystoma*. *J. Exp. Zool.* **59**, 61-86.



- Wartlick, O., Mumcu, P., Kicheva, A., Bittig, T., Seum, C., Jülicher, F. and González-Gaitán, M.** (2011). Dynamics of Dpp signaling and proliferation control. *Science* **331**, 1154-1159.
- Wartlick, O., Jülicher, F. and Gonzalez-Gaitan, M.** (2014). Growth control by a moving morphogen gradient during *Drosophila* eye development. *Development* **141**, 1884-1893.
- Weigmann, K., Cohen, S. M. and Lehner, C. F.** (1997). Cell cycle progression, growth and patterning in imaginal discs despite inhibition of cell division after inactivation of *Drosophila* Cdc2 kinase. *Development* **124**, 3555-3563.
- Wodarz, A., Ramrath, A., Grimm, A. and Knust, E.** (2000). *Drosophila* atypical protein kinase C associates with Bazooka and controls polarity of epithelia and neuroblasts. *J. Cell Biol.* **150**, 1361-1374.
- Wolff, T. and Ready, D. F.** (1991). The beginning of pattern formation in the *Drosophila* compound eye: the morphogenetic furrow and the second mitotic wave. *Development* **113**, 841-850.
- Wolff, T. and Ready, D. F.** (1993). Pattern formation in the *Drosophila* retina. In *The Development of Drosophila melanogaster*, Vol. 2, pp. 1277-1325. Cold Spring Harbor, NY: Cold Spring Harbor Laboratory Press.
